# Supplementary material for: Evaluating the neonatal BCG vaccination programme in Ireland
Source: PubMed Central journal article supplement (PMC4942954; doi:10.1186/s13690-016-0141-0), 2016-07-13
Supplement: 13690_2016_141_MOESM1_ESM.pdf [file 13690_2016_141_MOESM1_ESM.pdf]

Table 1: Resource utilisation and unit cost data for the direct cost estimate for an episode of latent TB (LTBI).

|                                                             |                                                               |              |       |         |       | Quantity | Unit Cost | Total Cost     |
|-------------------------------------------------------------|---------------------------------------------------------------|--------------|-------|---------|-------|----------|-----------|----------------|
| <b>A. DIAGNOSIS</b>                                         |                                                               |              |       |         |       | (qty)    |           |                |
| <b>Diagnostic Tests</b>                                     |                                                               |              |       |         |       |          |           |                |
|                                                             | Tuberculin Skin Test (TST)                                    |              |       |         |       | 1        | €20.95    | €20.95         |
|                                                             | Chest X-ray (CXR)                                             |              |       |         |       | 1        | €30.00    | €30.00         |
| <b>Physician Visits</b>                                     |                                                               |              |       |         |       |          |           |                |
|                                                             | Pediatrician Visit                                            |              |       |         |       | 1        | €170.93   | €170.93        |
|                                                             | Liver Function Tests (LFTs)                                   |              |       |         |       | 1        | €12.80    | €12.80         |
| <b>TOTAL Diagnosis COST</b>                                 |                                                               |              |       |         |       |          |           | <b>€234.68</b> |
| <b>B. Treatment</b>                                         |                                                               |              |       |         |       |          |           |                |
|                                                             |                                                               | daily dosage | mg/kg | #days   | %     | qty      | Unit Cost | Total Cost     |
| <b>Oral Antibiotics</b>                                     |                                                               |              |       |         |       |          |           |                |
|                                                             | Isoniazid                                                     | 125          | 5     | 168     | 50%   | 168      | €0.79     | €66.36         |
|                                                             | Rifampicin                                                    | 250          | 10    | 168     | 50%   | 168      | €0.48     | €40.32         |
| <b>Follow up Visits</b>                                     |                                                               |              |       |         |       |          |           |                |
|                                                             | Pediatrician follow up                                        |              |       |         | 50%   | 1        | €170.93   | €85.47         |
|                                                             | Out-patient follow up                                         |              |       |         | 50%   | 1        | €139.00   | €69.50         |
|                                                             | GP consult                                                    |              |       |         | 100%  | 2        | €35.39    | €70.78         |
|                                                             | Clinical Nurse Specialist follow up for management of therapy | 5 hrs/week   |       | 24weeks | 5.00% | 24       | €272.70   | €327.24        |
| <b>TOTAL (Cost per case of LTBI, detected with mantoux)</b> |                                                               |              |       |         |       |          |           | <b>€894.35</b> |
