# Supplementary material for: Evaluating the neonatal BCG vaccination programme in Ireland
Source: PubMed Central journal article supplement (PMC4942954; doi:10.1186/s13690-016-0141-0), 2016-07-13
Supplement: 13690_2016_141_MOESM2_ESM.pdf [file 13690_2016_141_MOESM2_ESM.pdf]

Table 2: Resource utilisation and unit cost data for the direct cost estimate for an episode of pulmonary TB.

|                                       |                                                  |                      |       |     |      | Quantity  | Unit Cost  | Total Cost       |
|---------------------------------------|--------------------------------------------------|----------------------|-------|-----|------|-----------|------------|------------------|
| <b>A. DIAGNOSIS</b>                   |                                                  |                      |       |     |      | (qty)     |            |                  |
| <b>Diagnostic Tests</b>               |                                                  |                      |       |     |      |           |            |                  |
|                                       | Tuberculin Skin Test                             |                      |       |     |      | 1         | €20.95     | €20.95           |
|                                       | Chest X-ray (CXR)                                |                      |       |     |      | 1         | €30.00     | €30.00           |
|                                       | Sputum Smear microscopy                          |                      |       |     |      | 3         | €58.41     | €175.23          |
|                                       | Polymerase Chain Reactions (PCRs)                |                      |       |     |      | 1         | €34.92     | €34.92           |
| <b>Physician Visits/Hospital days</b> |                                                  |                      |       |     |      |           |            |                  |
|                                       | Pediatrician Visit                               |                      |       |     |      | 2         | €170.93    | €341.86          |
|                                       | Ophthalmology visit prior to starting ethambutol |                      |       |     |      | 1         | €170.93    | €170.93          |
|                                       | Hospital Day (Peds ward)                         |                      |       |     |      | 9         | €555.00    | €4,995.00        |
| <b>TOTAL Diagnosis COST</b>           |                                                  |                      |       |     |      |           |            | <b>€5,768.89</b> |
| <b>B. Initial Treatment success</b>   |                                                  |                      |       |     |      |           |            |                  |
|                                       |                                                  | daily dosage (mg/kg) | #days | %   | qty  | Unit Cost | Total Cost |                  |
| <b>Oral Antibiotics</b>               |                                                  |                      |       |     |      |           |            |                  |
|                                       | Isoniazid                                        | 125                  | 5     | 168 | 100% | 168       | €0.79      | €132.72          |
|                                       | Rifampicin                                       | 250                  | 10    | 168 | 100% | 168       | €0.48      | €80.64           |
|                                       | Pyrazinamide                                     | 625                  | 25    | 56  | 100% | 56        | €0.39      | €21.84           |
|                                       | Ethambutol                                       | 500                  | 20    | 56  | 100% | 56        | €2.10      | €117.79          |
| <b>Physician Visits/Hospital Days</b> |                                                  |                      |       |     |      |           |            |                  |
|                                       | Follow-up Pediatrician visits                    |                      |       |     |      | 6         | €170.93    | €1,025.58        |
|                                       | Liver Function Tests (LFTs)                      |                      |       |     |      | 6         | €12.80     | €76.80           |
|                                       | Sputum smears & cultures                         |                      |       |     |      | 3         | €58.41     | €175.23          |
|                                       | Full Blood Count (FBC)                           |                      |       |     |      | 6         | €16.00     | €96.00           |

| <b>B. Initial Treatment success (cont)</b> | <b>daily dosage (mg/kg)</b> | <b>#days</b> | <b>%</b> | <b>qty</b> | <b>Unit Cost</b> | <b>Total Cost</b> |
|--------------------------------------------|-----------------------------|--------------|----------|------------|------------------|-------------------|
| <b>Follow-up</b>                           |                             |              |          |            |                  |                   |
| Follow-up CXR after 1 mth                  |                             |              |          | 1          | €30.00           | €30.00            |
| Repeat CXR                                 |                             |              |          | 1          | €30.00           | €30.00            |
| Eye review ophthalmology                   |                             |              |          | 1          | €170.93          | €170.93           |
| <b>Management of therapy</b>               |                             |              |          |            |                  |                   |
| Clinical Nurse Specialist                  | 5 hrs/week                  | 24weeks      | 5.00%    | 24         | €272.70          | €327.24           |
| <b>TOTAL Treatment Success COST</b>        |                             |              |          |            |                  | <b>€2,284.77</b>  |

€8,053.66

| <b>C. Treatment Failure</b>           | <b>daily dosage (mg/kg)</b> | <b>#days</b> | <b>%</b> | <b>qty</b> | <b>Unit Cost</b> | <b>Total Cost</b> |
|---------------------------------------|-----------------------------|--------------|----------|------------|------------------|-------------------|
| <b>Oral Antibiotics</b>               |                             |              |          |            |                  |                   |
| Isoniazid                             | 125                         | 5            | 168      | 100%       | 56               | €0.79 €44.24      |
| Rifampicin                            | 250                         | 10           | 168      | 100%       | 56               | €0.48 €26.88      |
| Pyrazinamide                          | 625                         | 25           | 56       | 100%       | 56               | €0.39 €21.84      |
| Ethambutol                            | 500                         | 20           | 56       | 100%       | 56               | €2.10 €117.79     |
| <b>Physician Visits/Hospital Days</b> |                             |              |          |            |                  |                   |
| Sputum smears & cultures              |                             |              |          | 1          | €58.41           | €58.41            |
| Follow-up Pediatrician visits         |                             |              |          | 1          | €170.93          | €170.93           |
| <b>TOTAL Treatment Failure COST</b>   |                             |              |          |            |                  | <b>€440.09</b>    |

| <b>D. Revised Treatment regimen success</b> | <b>daily dosage (mg/kg)</b> | <b>#days</b> | <b>%</b> | <b>qty</b> | <b>Unit Cost</b> | <b>Total Cost</b> |
|---------------------------------------------|-----------------------------|--------------|----------|------------|------------------|-------------------|
| <b>Oral Antibiotics</b>                     |                             |              |          |            |                  |                   |
| Isoniazid                                   | 125                         | 5            | 168      | 100%       | 168              | €0.79 €132.72     |
| Rifampicin                                  | 250                         | 10           | 168      | 100%       | 168              | €0.48 €80.64      |
| Pyrazinamide                                | 625                         | 25           | 28       | 100%       | 28               | €0.39 €10.92      |
| Ethambutol                                  | 500                         | 20           | 168      | 100%       | 168              | €2.10 €353.37     |

| <b>D. Revised Treatment regimen success</b> | <b>daily dosage (mg/kg)</b> | <b>#days</b> | <b>%</b> | <b>qty</b> | <b>Unit Cost</b> | <b>Total Cost</b> |
|---------------------------------------------|-----------------------------|--------------|----------|------------|------------------|-------------------|
| <b>Physician Visits/Hospital Days</b>       |                             |              |          |            |                  |                   |
| Follow-up Pediatrician visits               |                             |              |          | 6          | €170.93          | €1,025.58         |
| LFTs                                        |                             |              |          | 6          | €12.80           | €76.80            |
| Sputum smears & cultures                    |                             |              |          | 3          | €58.41           | €175.23           |
| FBC                                         |                             |              |          | 6          | €16.00           | €96.00            |
| <b>Follow-up</b>                            |                             |              |          |            |                  |                   |
| Follow-up CXR after 1 mth                   |                             |              |          | 1          | €30.00           | €30.00            |
| Repeat CXR                                  |                             |              |          | 1          | €30.00           | €30.00            |
| Eye review ophthalmology                    |                             |              |          | 1          | €170.93          | €170.93           |
| <b>Management of therapy</b>                |                             |              |          |            |                  |                   |
| Clinical Nurse Specialist                   | 5 hrs/week                  | 24weeks      | 5.00%    | 24         | €272.70          | €327.24           |
| <b>TOTAL Treatment Success COST</b>         |                             |              |          |            |                  | <b>€2,509.43</b>  |
