# Supplementary material for: Evaluating the neonatal BCG vaccination programme in Ireland
Source: PubMed Central journal article supplement (PMC4942954; doi:10.1186/s13690-016-0141-0), 2016-07-13
Supplement: 13690_2016_141_MOESM3_ESM.pdf [file 13690_2016_141_MOESM3_ESM.pdf]

Table 3: Resource utilisation and unit cost data for the direct cost estimate for an episode of extrapulmonary TB.

| <b>A. DIAGNOSIS</b>                   |                                    | <b>No of days</b> | <b>%</b> | <b>Quantity<br/>(qty)</b> | <b>Unit Cost</b> | <b>Total Cost</b> |
|---------------------------------------|------------------------------------|-------------------|----------|---------------------------|------------------|-------------------|
| <b>Diagnostic Tests</b>               |                                    |                   |          |                           |                  |                   |
|                                       | Tuberculin Skin Test               |                   | 100.0%   | 1                         | €20.95           | €20.95            |
|                                       | Chest X-ray (CXR)                  |                   | 100.0%   | 1                         | €30.00           | €30.00            |
|                                       | Sputum Smear microscopy            |                   | 100.0%   | 3                         | €58.41           | €175.23           |
|                                       | IGRA                               |                   | 50.0%    | 1                         | €65.00           | €32.50            |
|                                       | CT Scan                            |                   | 68.9%    | 1                         | €110.00          | €75.79            |
|                                       | MRI                                |                   | 10.0%    | 1                         | €194.00          | €19.40            |
|                                       | Ultrasound                         |                   | 36.8%    | 1                         | €115.00          | €42.32            |
|                                       | Peritoneal biopsy                  |                   | 4.7%     | 1                         | € 475.00         | €22.33            |
|                                       | Lymph node biopsy (INTRA-Thoracic) |                   | 9.5%     | 1                         | € 4,389.21       | €416.97           |
|                                       | Lymph node biopsy (EXTRA-Thoracic) |                   | 26.8%    | 1                         | € 745.81         | €199.88           |
|                                       | Liver biopsy (needle)              |                   | 3.7%     | 1                         | € 948.00         | €35.08            |
|                                       | Bone Biopsy                        |                   | 3.2%     | 1                         | € 291.00         | €9.31             |
|                                       | Pleural biopsy                     |                   | 23.7%    | 1                         | € 922.00         | €218.51           |
|                                       | Other (Bronchoscopy)               |                   | 15.8%    | 1                         | € 478.00         | €75.52            |
|                                       | Genitourinary (D&C)                |                   | 0.5%     | 1                         | € 399.00         | €2.00             |
|                                       | LP/CSF (incl C&S)                  |                   | 11.0%    | 1                         | € 158.30         | €17.41            |
|                                       | PCRs                               |                   | 100.0%   | 1                         | € 34.92          | €34.92            |
|                                       | Unknown                            |                   | 1.0%     | 1                         | € 347.00         | €3.47             |
| <b>Physician Visits/Hospital days</b> |                                    |                   |          |                           |                  |                   |
|                                       | Pediatrician consult               |                   |          |                           | € 170.93         | € 170.93          |
|                                       | ID/micro consult                   |                   |          |                           | € 170.93         | € 170.93          |
|                                       | Hospital Day (Peds ward)           | 14                |          |                           | €555             | € 7,770.00        |
| <b>TOTAL Diagnosis COST</b>           |                                    |                   |          |                           |                  | <b>€ 9,543.45</b> |

| <b>B. Treatment Success</b>           |                               | <b>daily dosage (mg/kg)</b> | <b>#days</b> | <b>%</b> | <b>Quantity (qty)</b> | <b>Unit Cost</b> | <b>Total Cost</b> |
|---------------------------------------|-------------------------------|-----------------------------|--------------|----------|-----------------------|------------------|-------------------|
| <b>Medical</b>                        |                               |                             |              |          |                       |                  |                   |
| <b>Oral Antibiotics</b>               |                               |                             |              |          |                       |                  |                   |
|                                       | Isoniazid                     | 125                         | 5            | 168      | 100.0%                | 168              | €0.79 €132.72     |
|                                       | Rifampicin                    | 250                         | 10           | 168      | 100.0%                | 168              | €0.48 €80.64      |
|                                       | Pyrazinamide                  | 625                         | 25           | 56       | 100.0%                | 56               | €0.39 €21.84      |
|                                       | Ethambutol                    | 500                         | 20           | 56       | 100.0%                | 56               | €2.10 €117.79     |
| <b>Surgical</b>                       |                               |                             |              |          |                       |                  |                   |
|                                       | Anterior spinal fusion        |                             |              |          | 3.2%                  | € 2,973.00       | € 95.14           |
| <b>Physician Visits/Hospital Days</b> |                               |                             |              |          |                       |                  |                   |
|                                       | Follow-up Pediatrician visits |                             |              |          |                       | 6 € 170.93       | € 1,025.58        |
|                                       | Liver Function Tests (LFTs)   |                             |              |          |                       | 6 € 12.80        | € 76.80           |
|                                       | CT Scan                       |                             |              |          | 68.9%                 | 2 €110.00        | €151.58           |
|                                       | MRI                           |                             |              |          | 10.0%                 | 2 €194.00        | €38.80            |
|                                       | Ultrasound                    |                             |              |          | 36.8%                 | 2 €115.00        | €84.64            |
|                                       | Full Blood Count (FBC)        |                             |              |          |                       | 9 € 16.00        | €144.00           |
| <b>Follow-up</b>                      |                               |                             |              |          |                       |                  |                   |
|                                       | Ophthalmology                 |                             |              |          |                       | 1 € 170.93       | € 170.93          |
| <b>Management of therapy</b>          |                               |                             |              |          |                       |                  |                   |
|                                       | Clinical Nurse Specialist     | 5 hrs/week                  | 24weeks      | 5.00%    | 24                    | €272.70          | €327.24           |
| <b>TOTAL Treatment Success COST</b>   |                               |                             |              |          |                       |                  | <b>€ 2,467.70</b> |

| C. Treatment Failure                  |     | daily dosage (mg/kg) | #days | %      | Quantity (qty) | Unit Cost | Total Cost      |
|---------------------------------------|-----|----------------------|-------|--------|----------------|-----------|-----------------|
| <b>Medical</b>                        |     |                      |       |        |                |           |                 |
| <b>Oral Antibiotics</b>               |     |                      |       |        |                |           |                 |
| Isoniazid                             | 125 | 5                    | 168   | 100.0% | 56             | €0.79     | €44.24          |
| Rifampicin                            | 250 | 10                   | 168   | 100.0% | 56             | €0.48     | €26.88          |
| Pyrazinamide                          | 625 | 25                   | 56    | 100.0% | 56             | €0.39     | €21.84          |
| Ethambutol                            | 500 | 20                   | 56    | 100.0% | 56             | €2.10     | €117.79         |
| <b>Physician Visits/Hospital Days</b> |     |                      |       |        |                |           |                 |
| Follow-up Pediatrician visits         |     |                      |       |        | 1              | € 170.93  | € 170.93        |
| Sputum smears & cultures              |     |                      |       |        | 1              | €58.41    | €58.41          |
| <b>TOTAL Treatment Failure COST</b>   |     |                      |       |        |                |           | <b>€ 440.09</b> |

| D. Revised Treatment Success          |     | daily dosage (mg/kg) | #days | %      | Quantity (qty) | Unit Cost  | Total Cost |
|---------------------------------------|-----|----------------------|-------|--------|----------------|------------|------------|
| <b>Medical</b>                        |     |                      |       |        |                |            |            |
| <b>Oral Antibiotics</b>               |     |                      |       |        |                |            |            |
| Isoniazid                             | 125 | 5                    | 168   | 100.0% | 280            | €0.79      | €221.20    |
| Rifampicin                            | 250 | 10                   | 168   | 100.0% | 280            | €0.48      | €134.40    |
| Pyrazinamide                          | 625 | 25                   | 56    | 100.0% | 56             | €0.39      | €21.84     |
| <b>Surgical</b>                       |     |                      |       |        |                |            |            |
| Anterior spinal fusion                |     |                      |       | 3.2%   |                | € 2,973.00 | € 95.14    |
| <b>Physician Visits/Hospital Days</b> |     |                      |       |        |                |            |            |
| Follow-up Pediatrician visits         |     |                      |       |        | 10             | € 170.93   | € 1,709.30 |
| LFTs                                  |     |                      |       |        | 10             | € 12.80    | € 128.00   |
| CT Scan                               |     |                      |       | 68.9%  | 2              | €110.00    | €151.58    |

| <b>D. Revised Treatment Success</b> |                             |              |          | <b>Quantity</b> | <b>Unit Cost</b> | <b>Total Cost</b> |
|-------------------------------------|-----------------------------|--------------|----------|-----------------|------------------|-------------------|
|                                     | <b>daily dosage (mg/kg)</b> | <b>#days</b> | <b>%</b> | <b>(qty)</b>    |                  |                   |
| MRI                                 |                             |              | 10.0%    | 2               | €194.00          | €38.80            |
| Ultrasound                          |                             |              | 36.8%    | 2               | €115.00          | €84.64            |
| FBC                                 |                             |              |          | 9               | € 16.00          | €144.00           |
| <b>Follow-up</b>                    |                             |              |          |                 |                  |                   |
| Ophthalmology                       |                             |              |          | 1               | € 170.93         | € 170.93          |
| <b>Management of therapy</b>        |                             |              |          |                 |                  |                   |
| Clinical Nurse Specialist           | 5 hrs/week                  | 40weeks      | 5.00%    | 40              | €272.70          | €545.40           |
| <b>TOTAL Treatment Success COST</b> |                             |              |          |                 |                  | <b>€ 3,445.23</b> |
