# Supplementary material for: Evaluating the neonatal BCG vaccination programme in Ireland
Source: PubMed Central journal article supplement (PMC4942954; doi:10.1186/s13690-016-0141-0), 2016-07-13
Supplement: 13690_2016_141_MOESM4_ESM.pdf [file 13690_2016_141_MOESM4_ESM.pdf]

Table 4: Resource utilisation and unit cost data for the direct cost estimate for an episode of TB Meningitis.

| <b>1. Diagnosis</b>                   | <b>Probability (%)</b>      | <b>Quantity (qty)</b> | <b>Unit Cost</b> | <b>Total Cost</b> |
|---------------------------------------|-----------------------------|-----------------------|------------------|-------------------|
| <b>Physician Visits/Hospital Days</b> |                             |                       |                  |                   |
| Pediatric ER visit                    | 100%                        | 1.5                   | € 222.00         | € 333.00          |
| <b>TOTAL</b>                          |                             |                       |                  | <b>€ 333.00</b>   |
| <b>Diagnostic Tests</b>               |                             |                       |                  |                   |
| LP/CSF analysis (incl.C+S)            | 100%                        | 1                     | € 158.00         | € 158.00          |
| Blood C+S                             | 100%                        | 1                     | € 29.10          | € 29.10           |
| Urine C+S                             | 100%                        | 1                     | € 29.10          | € 29.10           |
| FBC                                   | 100%                        | 1                     | € 16.00          | € 16.00           |
| IGRA                                  | 100.0%                      | 1                     | €65.00           | €65.00            |
| CXR                                   | 65%                         | 1                     | € 30.00          | € 19.50           |
| CT head                               | 30%                         | 1                     | € 96.00          | € 28.80           |
| EEG                                   | 10%                         | 1                     | € 174.60         | € 17.46           |
| PCRs                                  | 100%                        | 1                     | € 34.92          | € 34.92           |
| <b>TOTAL</b>                          |                             |                       |                  | <b>€ 397.88</b>   |
| <b>Physician Visits</b>               |                             |                       |                  |                   |
| Pediatrician consult                  |                             |                       | € 170.93         | € 170.93          |
| ID/micro consult                      |                             |                       | € 170.93         | € 170.93          |
| <b>TOTAL</b>                          |                             |                       |                  | <b>€ 341.86</b>   |
| <b>Antibiotics</b>                    |                             |                       |                  |                   |
|                                       | <b>daily dosage (mg/kg)</b> | <b>#days</b>          |                  |                   |
| Isoniazid                             | 5                           | 365                   | 100%             | €288.35           |
| Rifampicin                            | 10                          | 365                   | 100%             | €175.20           |
| Pyrazinamide                          | 25                          | 365                   | 100%             | €142.35           |
| Ethambutol                            | 20                          | 365                   | 100%             | €767.74           |
| Prednisolone                          | 1                           | 365                   | 100%             | €51.10            |
| <b>Management of therapy</b>          |                             |                       |                  |                   |
| Clinical Nurse Specialist             | 5 hrs/we                    | 5%                    | 52 weeks         | € 709.02          |
| <b>TOTAL</b>                          |                             |                       |                  | <b>€ 2,133.76</b> |
| <b>Diagnosis Total</b>                |                             |                       |                  | <b>€ 3,206.50</b> |
| <b>2. Stable patient</b>              |                             |                       |                  |                   |
|                                       | <b>Probability (%)</b>      | <b>Quantity</b>       | <b>Unit Cost</b> | <b>Total Cost</b> |
| <b>Physician Visits/Hospital Days</b> |                             |                       |                  |                   |
| Hospital stay (Peds ward)             | 100%                        | 14                    | € 555.00         | € 7,770.00        |
| <b>TOTAL</b>                          |                             |                       |                  | <b>€ 7,770.00</b> |
| <b>Stable patient Total</b>           |                             |                       |                  | <b>€ 7,770.00</b> |
| <b>3. Success (medical)</b>           |                             |                       |                  |                   |
|                                       | <b>Probability (%)</b>      | <b>Quantity</b>       | <b>Unit Cost</b> | <b>Total Cost</b> |
| <b>Physician Visits/Hospital Days</b> |                             |                       |                  |                   |
| Follow-up Pediatrician visit          | 100%                        | 3                     | € 170.93         | € 512.79          |
| <b>TOTAL</b>                          |                             |                       |                  | <b>€ 512.79</b>   |
| <b>Success (medical) Total</b>        |                             |                       |                  | <b>€ 512.79</b>   |

| <b>4. Persistent Fever</b>            | <b>Probability (%)</b> | <b>Quantity</b> | <b>Unit Cost</b> | <b>Total Cost</b> |
|---------------------------------------|------------------------|-----------------|------------------|-------------------|
| <b>Physician Visits/Hospital Days</b> |                        |                 |                  |                   |
| Hospital Day (Peds ward)              | 100%                   | 8               | € 555.00         | € 4,440.00        |
| <b>TOTAL</b>                          |                        |                 |                  | <b>€ 4,440.00</b> |
| <b>Diagnostic Tests</b>               |                        |                 |                  |                   |
| LP/CSF analysis (incl.C+S)            | 50%                    | 1               | € 158.00         | € 79.00           |
| Blood C+S                             | 100%                   | 1               | € 29.10          | € 29.10           |
| FBC                                   | 100%                   | 1               | € 16.00          | € 16.00           |
| CXR                                   | 60%                    | 1               | € 30.00          | € 18.00           |
| CT head                               | 70%                    | 1               | € 96.00          | € 67.20           |
| MRI head                              | 10%                    | 1               | € 190.00         | € 19.00           |
| EEG                                   | 10%                    | 1               | € 174.60         | € 17.46           |
| <b>TOTAL</b>                          |                        |                 |                  | <b>€ 245.76</b>   |
| <b>TOTAL</b>                          |                        |                 |                  | <b>€ 4,685.76</b> |
| <b>Persistent Fever Total</b>         |                        |                 |                  | <b>€ 4,685.76</b> |

| <b>5. Respond to treatment</b>        | <b>Probability (%)</b> | <b>Quantity</b> | <b>Unit Cost</b> | <b>Total Cost</b> |
|---------------------------------------|------------------------|-----------------|------------------|-------------------|
| <b>Physician Visits/Hospital Days</b> |                        |                 |                  |                   |
| Pediatric Neurosurgical Consult       | 100%                   | 1               | € 170.93         | € 170.93          |
| <b>TOTAL</b>                          |                        |                 |                  | <b>€ 170.93</b>   |
| <b>Respond to treatment Total</b>     |                        |                 |                  | <b>€ 170.93</b>   |

  

| <b>6. Septic Patient</b>              | <b>Probability (%)</b> | <b>Quantity</b> | <b>Unit Cost</b> | <b>Total Cost</b>  |
|---------------------------------------|------------------------|-----------------|------------------|--------------------|
| <b>Physician Visits/Hospital Days</b> |                        |                 |                  |                    |
| ICU Day                               | 100%                   | 5               | € 2,051.40       | € 10,257.00        |
| Hospital days                         | 100%                   | 10              | € 555.00         | € 5,550.00         |
| <b>TOTAL</b>                          |                        |                 |                  | <b>€ 15,807.00</b> |
| <b>Diagnostic Tests</b>               |                        |                 |                  |                    |
| Co ag test                            |                        | 1               | € 60.53          | € 60.53            |
| LP/CSF analysis (incl.C+S)            | 75%                    | 1               | € 158.30         | € 118.73           |
| FBC                                   | 100%                   | 4               | € 16.00          | € 64.00            |
| renal profile                         | 100%                   | 1               | € 10.00          | € 10.00            |
| LFTs                                  | 100%                   | 1               | € 12.80          | € 12.80            |
| MRI                                   | 100%                   | 1               | € 194.00         | € 194.00           |
| <b>TOTAL</b>                          |                        |                 |                  | <b>€ 460.06</b>    |
|                                       |                        |                 |                  | <b>€ 0.00</b>      |
| <b>Septic Patient total</b>           |                        |                 |                  | <b>€ 16,267.06</b> |

| <b>7. Neurosurgical Drainage</b>      | <b>Probability (%)</b> | <b>Quantity</b> | <b>Unit Cost</b> | <b>Total Cost</b> |
|---------------------------------------|------------------------|-----------------|------------------|-------------------|
| <b>Physician Visits/Hospital Days</b> |                        |                 |                  |                   |
| Neurosurgical Drainage of             | 100%                   | 1               | € 3,430.64       | € 3,430.64        |
| Hospital days                         | 100%                   | 7               | € 555.00         | € 3,885.00        |
| <b>TOTAL</b>                          |                        |                 |                  | <b>€ 7,315.64</b> |
| <b>Neurosurgical Drainage Total</b>   |                        |                 |                  | <b>€ 7,315.64</b> |

| <b>8. Success (surgical)</b>          | <b>Probability (%)</b> | <b>Quantity</b> | <b>Unit Cost</b> | <b>Total Cost</b> |
|---------------------------------------|------------------------|-----------------|------------------|-------------------|
| <b>Physician Visits/Hospital Days</b> |                        |                 |                  |                   |
| Follow-up Pediatrician visit          | 100%                   | 9               | € 170.93         | € 1,538.37        |
| Follow-up Pediatric Neurosurgeon      | 100%                   | 3               | € 170.93         | € 512.79          |
| <b>TOTAL</b>                          |                        |                 |                  | <b>€ 2,051.16</b> |
| <b>Success (surgical) Total</b>       |                        |                 |                  | <b>€ 2,051.16</b> |
|                                       |                        |                 |                  |                   |
| <b>10. Spontaneous resolution</b>     | <b>Probability (%)</b> | <b>Quantity</b> | <b>Unit Cost</b> | <b>Total Cost</b> |
| <b>Physician Visits/Hospital Days</b> |                        |                 |                  |                   |
| Follow-up Pediatrician visit          | 100%                   | 9               | € 170.93         | € 1,538.37        |
| Pediatric Neurosurgical Consult       | 100%                   | 1               | € 170.93         | € 170.93          |
| <b>TOTAL</b>                          |                        |                 |                  | <b>€ 1,709.30</b> |
| <b>Spontaneous resolution total</b>   |                        |                 |                  | <b>€ 1,709.30</b> |
|                                       |                        |                 |                  |                   |
| <b>9. Failure</b>                     | <b>Probability (%)</b> | <b>Quantity</b> | <b>Unit Cost</b> | <b>Total Cost</b> |
| <b>Physician Visits/Hospital Days</b> |                        |                 |                  |                   |
| Hospital Day (Peds ward)              | 100%                   | 6               | € 555.00         | € 3,330.00        |
| <b>TOTAL</b>                          |                        |                 |                  | <b>€ 3,330.00</b> |
| <b>TOTAL</b>                          |                        |                 |                  | <b>€ 0.00</b>     |
| <b>Failure/Death Total</b>            |                        |                 |                  | <b>€ 3,330.00</b> |
