# Supplementary material for: Evaluating the neonatal BCG vaccination programme in Ireland
Source: PubMed Central journal article supplement (PMC4942954; doi:10.1186/s13690-016-0141-0), 2016-07-13
Supplement: 13690_2016_141_MOESM5_ESM.pdf [file 13690_2016_141_MOESM5_ESM.pdf]

**Table 5: Cost of long term complications of meningitis**

| <b>HEARING LOSS</b>                    | <b>Probability (%)</b> | <b>Quantity</b> | <b>Unit Cost</b> | <b>Total Cost</b> |
|----------------------------------------|------------------------|-----------------|------------------|-------------------|
| <b>Health Care Professional Visits</b> |                        |                 |                  |                   |
| Follow-up Pediatrician visit           | 100%                   | 3               | €170.93          | € 512.79          |
| Speech Therapist                       | 50%                    | 3               | € 54.96          | € 82.44           |
| <b>TOTAL</b>                           |                        |                 |                  | <b>€ 595.23</b>   |
| <b>Diagnostic Tests</b>                |                        |                 |                  |                   |
| Audiometry                             | 100%                   | 3               | € 30.13          | € 90.39           |
| ABR/BAER                               | 100%                   | 2               | € 66.17          | € 132.34          |
| <b>TOTAL</b>                           |                        |                 |                  | <b>€ 222.73</b>   |
| <b>Non-Surgical Therapies</b>          |                        |                 |                  |                   |
| Hearing Aids (2)                       | 90%                    | 1               | € 3,057.92       | € 2,752.13        |
| <b>TOTAL</b>                           |                        |                 |                  | <b>€ 2,752.13</b> |
| <b>Surgical Procedures</b>             |                        |                 |                  |                   |
| Cochlear Implantation                  | 0.5%                   | 1               | € 51,707.00      | € 258.54          |
| <b>TOTAL</b>                           |                        |                 |                  | <b>€ 258.54</b>   |
| <b>HEARING LOSS: TOTAL COST</b>        |                        |                 |                  | <b>€ 3,828.62</b> |

| <b>DEV. DELAY/MR</b>                   | <b>Probability (%)</b> | <b>Quantity</b> | <b>Unit Cost</b> | <b>Total Cost</b> |
|----------------------------------------|------------------------|-----------------|------------------|-------------------|
| <b>Health Care Professional Visits</b> |                        |                 |                  |                   |
| Follow-up Pediatrician visit           | 100%                   | 6               | €170.93          | € 1,025.58        |
| Occupational Therapist                 | 100%                   | 6               | € 54.96          | € 329.76          |
| Physiotherapist                        | 100%                   | 12              | € 54.96          | € 659.52          |
| Speech Therapist                       | 100%                   | 12              | € 54.96          | € 659.52          |
| <b>TOTAL</b>                           |                        |                 |                  | <b>€ 2,674.38</b> |
| <b>Diagnostic Tests</b>                |                        |                 |                  |                   |
| Psychometric Testing                   | 100%                   | 1               | € 953.42         | € 953.42          |
| <b>TOTAL</b>                           |                        |                 |                  | <b>€ 953.42</b>   |
| <b>DEV. DELAY/MR: TOTAL COST</b>       |                        |                 |                  | <b>€ 3,627.80</b> |

| <b>FOCAL NEURO DEFICITS</b>                   | <b>Probability (%)</b> | <b>Quantity</b> | <b>Unit Cost</b> | <b>Total Cost</b> |
|-----------------------------------------------|------------------------|-----------------|------------------|-------------------|
| <b>Health Care Professional Visits</b>        |                        |                 |                  |                   |
| Pediatric Neurologist                         | 100%                   | 3               | € 170.93         | € 512.79          |
| Pediatric Neurosurgeon(initial visit)         | 40%                    | 1               | € 170.93         | € 68.37           |
| Pediatric Neurosurgeon                        | 40%                    | 1               | € 170.93         | € 68.37           |
| Pediatric Orthopedic Surgeon (initial visit)  | 25%                    | 1               | € 170.93         | € 42.73           |
| Occupational Therapist                        | 100%                   | 6               | € 54.96          | € 329.76          |
| Physiotherapist                               | 100%                   | 12              | € 54.96          | € 659.52          |
| Speech Therapist                              | 100%                   | 12              | € 54.96          | € 659.52          |
| <b>TOTAL</b>                                  |                        |                 |                  | <b>€ 2,341.07</b> |
| <b>Diagnostic Tests</b>                       |                        |                 |                  |                   |
| CT head                                       | 100%                   | 1               | € 96.00          | € 96.00           |
| EEG                                           | 100%                   | 1               | € 174.60         | € 174.60          |
| <b>TOTAL</b>                                  |                        |                 |                  | <b>€ 270.60</b>   |
| <b>Surgical Procedures</b>                    |                        |                 |                  |                   |
| Ventriculoperitoneal Shunt Placement/Revision | 20%                    | 1               | € 3,430.64       | € 686.13          |
| <b>TOTAL</b>                                  |                        |                 |                  | <b>€ 686.13</b>   |
| <b>FOCAL NEURO DEFICITS: TOTAL COST</b>       |                        |                 |                  | <b>€ 3,297.79</b> |

| <b>CHRONIC SEIZURES</b>                | <b>Probability (%)</b> | <b>Quantity</b> | <b>Unit Cost</b> | <b>Total Cost</b> |
|----------------------------------------|------------------------|-----------------|------------------|-------------------|
| <b>Health Care Professional Visits</b> |                        |                 |                  |                   |
| Follow-up Pediatrician visit           |                        |                 | 170.93           | €170.93           |
| Pediatric Neurologist                  | 100%                   | 3               | € 170.93         | € 512.79          |
| <b>TOTAL</b>                           |                        |                 |                  | <b>€ 512.79</b>   |
| <b>Diagnostic Tests</b>                |                        |                 |                  |                   |
| EEG                                    | 100%                   | 2               | € 174.60         | € 349.20          |
| <b>TOTAL</b>                           |                        |                 |                  | <b>€ 349.20</b>   |
| <b>Non-Surgical Therapies</b>          |                        |                 |                  |                   |
| Carbamazepine (400mg)                  | 100%                   | 365             | € 0.16           | € 58.40           |
| <b>TOTAL</b>                           |                        |                 |                  | <b>€ 58.40</b>    |
| <b>CHRONIC SEIZURES: TOTAL COST</b>    |                        |                 |                  | <b>€ 1,091.32</b> |

| <b>Table 6: Long term cost of disability per patient over 15 years</b> |            |                          |                    |  |
|------------------------------------------------------------------------|------------|--------------------------|--------------------|--|
| Long term cost per disability (cost per patient over 15 years)         |            | Likelihood of disability | Cost * Probability |  |
| Hearing Loss                                                           | €46,396.74 | 7.0%                     | €3,247.77          |  |
| Dev. Delay                                                             | €43,963.05 | 50.0%                    | €21,981.53         |  |
| Focal Neuro Deficits                                                   | €39,963.96 | 25.0%                    | €9,990.99          |  |
| Chronic Seizures                                                       | €13,225.04 | 7.6%                     | €1,005.10          |  |
| <b>Long-term cost of disability in € per case (over 15 yrs)</b>        |            |                          | <b>€36,225.39</b>  |  |
